# Supplementary material for: A unique mechanism of successful fertilization in a domestic bird
Source: PubMed Central journal article supplement (PMC4287725; doi:10.1038/srep07700), 2015-01-09
Supplement: srep07700-s1.pdf [file srep07700-s1.pdf]

## **A unique mechanism of successful fertilization in a domestic bird**

Tomohiro Sasanami<sup>1</sup>, Shunsuke Izumi<sup>2</sup>, Naoki Sakurai<sup>3</sup>, Toshifumi Hirata<sup>2</sup>, Shusei Mizushima<sup>1</sup>, Mei Matsuzaki<sup>1</sup>, Gen Hiyama<sup>1</sup>, Eriko Yorinaga<sup>4</sup>, Takashi Yoshimura<sup>4</sup>, Kazuyoshi Ukena<sup>5</sup>, Kazuyoshi Tsutsui<sup>6\*</sup>

<sup>1</sup>Department of Applied Biological Chemistry, Faculty of Agriculture, Shizuoka University, 836 Ohya, Shizuoka 422-8529, Japan.

<sup>2</sup>Department of Mathematical and Life Sciences, Graduate School of Science, Hiroshima University, Higashi-Hiroshima 739-8526, Japan.

<sup>3</sup>Department of Environmental Dynamics and Management, Graduate School of Biosphere Science, Hiroshima University, Higashi-Hiroshima 739-8526, Japan.

<sup>4</sup>Graduate School of Bioagricultural Sciences, Nagoya University, Furo-cho, Chikusa-ku, Nagoya 464-8601, Japan.

<sup>5</sup>Section of Behavioural Sciences, Division of Human Sciences, Graduate School of Integrated Arts and Sciences, Hiroshima University, Higashi-Hiroshima 739-8526, Japan.

<sup>6</sup>Department of Biology and Center for Medical Life Science, Waseda University, 2-2 Wakamatsu-cho, Shinjuku, Tokyo 162-8480, Japan.

\*Corresponding to: Kazuyoshi Tsutsui, Department of Biology and Center for Medical Life Science, Waseda University, 2-2 Wakamatsu-cho, Shinjuku, Tokyo 162-8480, Japan. Email: k-tsutsui@waseda.jp

### **Supplementary Information**

Table S1: Free monosaccharide composition from water soluble extracts of the cloacal gland and testis.

Figure S1: Effects of AL8110 on the PGF<sub>2α</sub>-induced spontaneous contractions of the isolated vagina.

Figure. S2: Expression of the receptor for PGF<sub>2α</sub> in the utero-vaginal junction (UVJ).

Caption to Movie S1: Appearance of cloacal gland secretion (CGS).

Data of Structural analysis

**Table S1. Free monosaccharide composition from water soluble extracts of the cloacal gland and testis.**

| Gland         | Sugar content |     |     |            |     |     |
|---------------|---------------|-----|-----|------------|-----|-----|
|               | Gal           | Fru | Glc | Gal        | Fru | Glc |
|               | (µg/g)        |     |     | (µg/gland) |     |     |
| Cloacal gland | 115           | 43  | 85  | 75         | 28  | 55  |
| Testis        | 45            | 49  | 0*  | 136        | 148 | 0*  |

Free fructose (Fru) content in the extracts was determined by an HPLC system equipped with a pulsed amperometric detector, and free galactose (Gal) and glucose (Glc) were reduced and acetylated to alditol acetate form and were determined by GLC using inositol as an internal standard. \*, Free glucose (Glc) in the testis was not detected by gas chromatography.

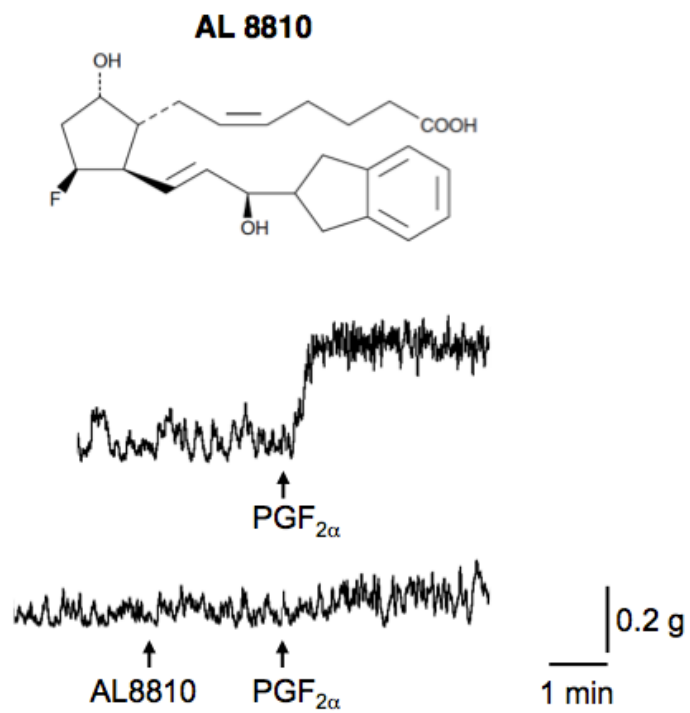

**Figure S1 | Effects of AL 8110 on the  $\text{PGF}_2$ -induced spontaneous contractions of the isolated vagina.** The upward arrow indicated application of each chemical.

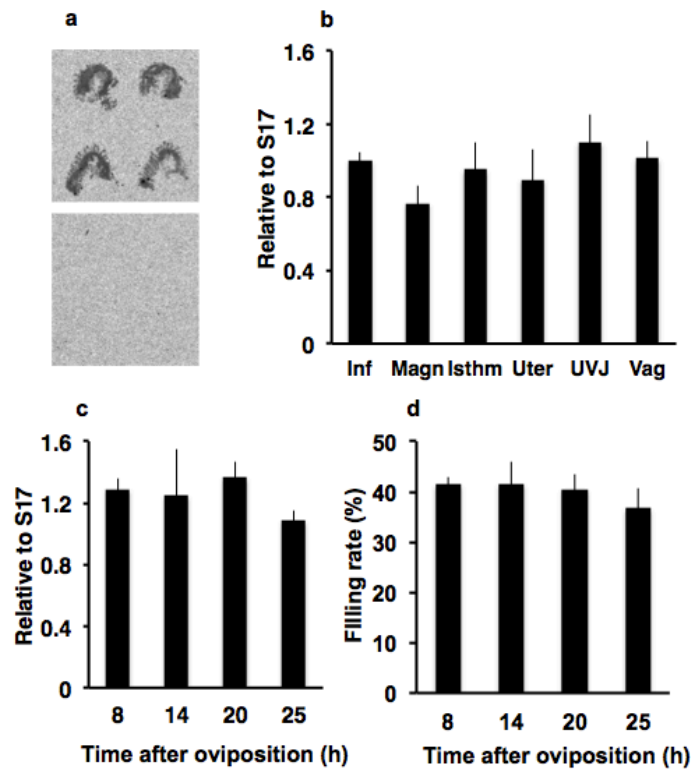

**Figure S2 | Expression of the receptor for PGF<sub>2α</sub>.** **a**, Autoradiograms of the UVJ sections after hybridization with <sup>33</sup>P-labeled antisense probe specific for the receptor for PGF<sub>2α</sub> (upper panel) or sense probe (lower panel) are shown. Representative results of two experiments are shown (n = 2). **b**, RT-PCR analysis of the receptor for PGF<sub>2α</sub>. The infundibulum (Inf), magnum (Magn), isthmus (Isthm), uterus (Uter), UVJ or vagina (Vag) isolated from females at 14 h after egg-laying were processed for RT-PCR analysis using gene-specific primers. Data were normalized with S17 ribosomal protein and expressed as the mean ± SEM of three independent experiments. **c**, RT-PCR analysis of the receptor for PGF<sub>2α</sub> during ovulatory cycle. The UVJ isolated from females at 8, 14, 20 or 25 h after egg-laying were processed for RT-PCR analysis using gene-specific primers. Data were normalized with S17 ribosomal protein and expressed as the mean ± SEM of three independent experiments. **d**, Comparison of sperm filling rate during ovulatory cycle. Females were mated at 8, 14, 20 or 25 h after egg-laying. The utero-vaginal junction mucosa was isolated from the bird, and SST was observed under fluorescence microscope. Sperm filling rate was calculated and expressed as the mean ± SEM. 3–5 birds were used within each treatment.

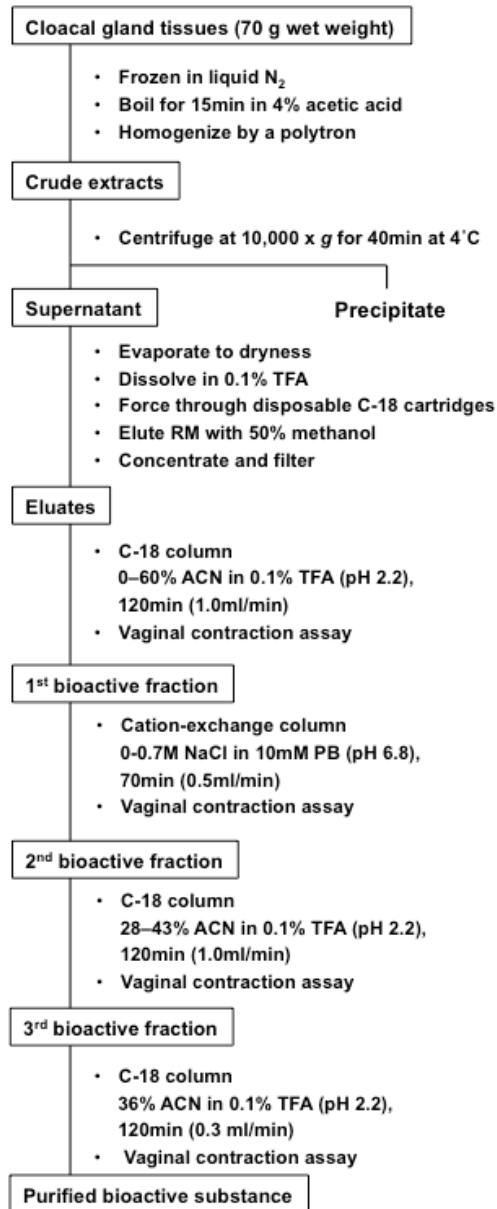

**Figure S3 | Purification scheme of bioactive substance from cloacal gland extracts.** TFA: trifluoroacetic acid , RM: retained materials, ACN: acetonitrile, PB: phosphate buffer.

**Caption to Movie S1**

**Appearance of cloacal gland secretion (CGS).**

The cloacal gland (CG) of male quail ejects CGS as a meringue-like foam by pushing lightly with the thumb and index finger.

### **Data of structural analysis**

The MS, IR and <sup>1</sup>H NMR spectra of the isolated bioactive substance were as follows:

MS m/z 355 (M+1), 337 [(M-H<sub>2</sub>O)+1], 319 [(M-2H<sub>2</sub>O)+1] and 301 [(M-3H<sub>2</sub>O)+1]; IR (Liq. film) ν 3400-3300 (OH) and 1708 cm<sup>-1</sup> (COOH); <sup>1</sup>H NMR δ 0.89 (3H, t, J=6.5 Hz, 20-H<sub>3</sub>), 4.02 (1H, m, 11-H), 4.22 (1H, q, J=6.2 Hz, 15-H), 4.25 (1H, dd, J=5.4 and 4.5 Hz, 9-H), 5.38 (1H, bq, J=7.5 Hz, 5-H), 5.53 (1H, bq, J=7.5 Hz, 6-H), 5.59 and 5.60 (2H, m, 13- and 14-H). The spectroscopic data of the isolated bioactive substance were found to be prostaglandin F<sub>2</sub>α (PGF<sub>2</sub>α) as compared with the spectra of authentic specimens, such as PGF<sub>2</sub>α, (15R)-PGF<sub>2</sub>α and (13Z, 15R)-PGF<sub>2</sub>α (Cayman Chemical).
